# Supplementary material for: Ser/Thr kinase Trc controls neurite outgrowth in Drosophila by modulating microtubule-microtubule sliding
Source: eLife. 2020 Feb 5;9:e52009. doi: 10.7554/eLife.52009 (PMC7021487; doi:10.7554/eLife.52009)
Supplement: Figure 1—source data 1. — Related to Figure 1A and B. [file elife-52009-fig1-data1.xlsx]

## Sheet: Normalised Sliding rates 1B
ctrl/normalized sliding	pav RNAi/ normalized sliding	Trc RNAi/normalized sliding
0.585987	14.828	6.36943
0.942675	12.3822	5.98726
1.24841	8.96815	4.66242
1.22293	6.49681	4.61146
	1.3758	4.35669
		2.34395
1.4782	2.82166	2.17966
1.32761	1.72787	1.65654
1.34346	1.70013	1.16909
0.925363	0.511229	0.90753
0.780713	0.465654	0.626156
0.14465	0.116909	0.485469
	0.166446	0.257596
1.64023	3.94334	1.73371
1.32578	3.17847	1.11331
0.875354	2.75354	1.27479
0.730878	2.08215	1.01983
0.705382	1.01983	0.866856
0.72238	0.152975	0.535411
	0.263456	0.331445
