# Supplementary material for: Ser/Thr kinase Trc controls neurite outgrowth in Drosophila by modulating microtubule-microtubule sliding
Source: eLife. 2020 Feb 5;9:e52009. doi: 10.7554/eLife.52009 (PMC7021487; doi:10.7554/eLife.52009)
Supplement: Figure 1—source data 2. — Related to Figure 1C and D. [file elife-52009-fig1-data2.xlsx]

## Sheet: Sheet1
	ctrl 24hrs/um	Trc RNAi 24hrs/um	ctrl 48hrs/um	Trc RNAi 48hrs/um	ctrl 72hrs/um	Trc RNAi 72hrs/um
	134.244	235.694	144.336	368.17	240.083	319.695
	117.663	200.512	107.14	198.828	267.824	299.739
	112.975	252.388	61.885	475.64	116.34	152.352
	43.468	278.993	112.357	218.512	134.716	199.179
	137.149	409.164	270.351	192.452	193.218	205.371
	90.372	213.903	115.288	274.612	106.769	372.954
	81.94	437.958	175.742	228.192	86.564	607.263
	83.142	147.944	211.669	266.308	204.38	335.829
	90.189	190.136	164.932	338.114	162.143	380.185
	176.678	323.756	289.047	325.072	123.781	280.593
	108.634	352.264	141.561	244.651	78.882	305.572
	291.634	360.11	336.225	172.318	169.833
	184.222	233.897	268.39	252.209	49.418
	68.832	157.896		448.873	198.339
					192.81
					143.376
					86.006
					210.684
					203.915
	139.62	184.673	102.801	230.432
	178.345	129.226	118.14	146.759
	104.453	143.514	89.041	95.44
	158.289	255.454	78.555	200.083
	173.38	261.234	94.647	283.184
	218.062	334.175	154.203	228.925
	175.853	231.868	223.308	143.483
	162.681		142.956	133.215
			173.203	312.906
			190.405
