# Supplementary material for: Ser/Thr kinase Trc controls neurite outgrowth in Drosophila by modulating microtubule-microtubule sliding
Source: eLife. 2020 Feb 5;9:e52009. doi: 10.7554/eLife.52009 (PMC7021487; doi:10.7554/eLife.52009)
Supplement: Figure 1—source data 3. — Related to Figure 1E and F. [file elife-52009-fig1-data3.xlsx]

## Sheet: Sheet1
	Ctrl/normalized sliding	TrcRNAi/normalized sliding
	1.60808	3.0303
	1.81818	1.47609
	1.0936	1.69697
	0.622222	0.931987
	0.425589	1.56498
	1.00471	1.35219
	1.39798	1.31178
	0.02963
	1.45097	4.66311
	1.35424	2.05137
	0.54036	0.426951
	0.850567	0.797198
	0.803869	0.096731
	2.65688	4.01295
	1.15769	3.9251
	0.836032	2.6002
	0.461943	1.92429
	1.01174	0.674494
	0.705668	0.50587
	0.17004	0.238057
		0.535628
