# Supplementary material for: Ser/Thr kinase Trc controls neurite outgrowth in Drosophila by modulating microtubule-microtubule sliding
Source: eLife. 2020 Feb 5;9:e52009. doi: 10.7554/eLife.52009 (PMC7021487; doi:10.7554/eLife.52009)
Supplement: Figure 2—figure supplement 1—source data 1. — Related to Figure 2—figure supplement 1B and C. [file elife-52009-fig2-figsupp1-data1.xlsx]

## Sheet: Sheet1
	Ctrl/AU	Fry RNAi/AU
	8875	2874
	24987	19714
	12401	6742
	35123	53318
	32981	2573
	183551	21217
	34086	2307
	106814	19333
	21579	4572
	94868	16674
	46277	3361
	64734	16419
		4961
		21324
