# Supplementary material for: Ser/Thr kinase Trc controls neurite outgrowth in Drosophila by modulating microtubule-microtubule sliding
Source: eLife. 2020 Feb 5;9:e52009. doi: 10.7554/eLife.52009 (PMC7021487; doi:10.7554/eLife.52009)
Supplement: Figure 2—source data 1. — Related to Figure 2A and B. [file elife-52009-fig2-data1.xlsx]

## Sheet: Sheet1
	ctrl/ normalized sliding	trc 3'UTR RNAi/normalized sliding	3'UTR + WT/normalized sliding	3'UTR +CA/normalized sliding	3'UTR +kinase dead/normalized sliding
	2.65396	4.01774	2.81094	3.07099	5.20981
	1.80528	2.47245	2.59509	1.57022	6.56377
	1.46679	2.27623	1.57962	1.39661	4.98415
	0.220755	1.96717	1.3834	1.63194	3.19359
	0.210943	0.730943	1.33925	1.20756	2.64415
		0.647547	0.961509	1.0571	2.46755
		0.426792	0.48566	0.590278	1.74151
		0.569057	0.559245	0.297068	0.377736
		0.618113	0.647547	0.023148	0.618113
			0.74566	0.667438	1.29509
	1.78076	4.70943	1.17245		1.4717
	1.7366	3.79208	0.922264	1.23921	1.08906
	1.34415	3.64981	0.627925	1.06068	0.912453
	0.569057	3.05132	0.495472	1.15519	0.564151
	0.156981	2.62453	0.446415	0.609102	0.883019
	0.387547	2.08981	0.353208	0.472579	0.382642
	0.353208	1.3834	0.255094	0.509335	0.274717
	0.313962	1.03019		0.252042	0.166792
		0.902642		0.2993	0.122642
		0.490566			0.083396
					0.083396
	3.67721	3.41139	1.23101
	2.5538	2.17405	1.17721
	1.15506	1.21835	1.23734
	1.08228	0.981013	0.920886
	0.844937	0.740506	1.08544
	0.68038	0.60443	0.528481
	0.642405	0.278481	0.471519
	0.452532		0.392405
	0.094937		0.316456
	0.164557
	0.525316
	0.126582
	2.12121	2.04316	1.23737		1.3843
	1.31313	1.61616	0.842516		1.0101
	1.03535	1.51286	0.672635		0.959596
	0.42011	0.757576	0.289256		0.932048
	0.110193	0.259412	0.176768		0.732323
		0.330579
	2.26251	1.0437	1.25617		2.95831
	0.43429	0.656104	1.26785		2.49133
	1.66244	0.303536	1.1581		2.27185
	0.597732	0.189126	0.908272		2.29053
	0.695797		0.628085		1.97999
	0.660774		0.382922		2.1014
	0.686458				1.23983
					0.469313
					0.763509
					0.560374
					0.607071
	1.43874	3.21879	1.91657		2.00583
	1.33897	2.75671	1.43874		1.41248
	1.16569	2.50992	1.2182		1.1972
	1.27071	1.97433	1.13419		0.530338
	0.887398	1.53326	0.798133		0.514586
	1.14469	1.88506	0.546091		0.404317
	0.834889	1.43349	0.766628
	0.404317	1.04492	0.651109
	0.514586	1.27596	0.677363
		1.14469	0.850642
		0.488331
		1.09218
		0.383314
		0.635356
