# Supplementary material for: Ser/Thr kinase Trc controls neurite outgrowth in Drosophila by modulating microtubule-microtubule sliding
Source: eLife. 2020 Feb 5;9:e52009. doi: 10.7554/eLife.52009 (PMC7021487; doi:10.7554/eLife.52009)
Supplement: Figure 2—source data 2. — Related to Figure 2C and D. [file elife-52009-fig2-data2.xlsx]

## Sheet: Sheet1
	Ctrl/ normalized sliding	Fry dsRNA/ normalized sliding
	1.23596	3.78817
	1.7401	3.30149
	1.18717	2.67013
	1.13838	2.1703
	1.02454	2.10454
	0.910705	1.39426
	1.0408	1.15749
	0.390301
	0.422828	0.447213
	0.308989	0.302528
	0.113838	0.052615
	0.097576	0.933888
	0.081314	0.618207
		0.526134
	1.65878	0.552442
	1.12212	0.47352
	1.08959	0.407754
	0.926967	0.197299
	0.569189
		4.59052
		3.9197
		2.30184
		2.15715
		1.40741
		0.933888
		0.841813
		5.39288
		0.368294
	2.84282	0.210453
	1.6116	0.131534
	1.72171	5.69565
	1.95193	2.48246
	1.28127	3.07305
	0.710705	3.7337
	0.400397	1.08107
	0.420417	2.39237
		1.80179
		0.940933
		0.100099
