# Supplementary material for: Ser/Thr kinase Trc controls neurite outgrowth in Drosophila by modulating microtubule-microtubule sliding
Source: eLife. 2020 Feb 5;9:e52009. doi: 10.7554/eLife.52009 (PMC7021487; doi:10.7554/eLife.52009)
Supplement: Figure 3—figure supplement 1—source data 1. — Related to B and C. [file elife-52009-fig3-figsupp1-data1.xlsx]

## Sheet: Sheet1
	WT (GFP /mcherry signal)	S745A (GFP /mcherry signal)
	1.19206	0.861267
	1.02304	0.843264
	0.871206	0.920096
	0.976635	0.889456
	0.937056	0.879783
	0.967011	1.13804
	0.987769	1.04996
	0.949105	1.02924
	1.10011	0.983816
	0.99601
