# Supplementary material for: Ser/Thr kinase Trc controls neurite outgrowth in Drosophila by modulating microtubule-microtubule sliding
Source: eLife. 2020 Feb 5;9:e52009. doi: 10.7554/eLife.52009 (PMC7021487; doi:10.7554/eLife.52009)
Supplement: Figure 3—source data 1. — Related to Figure 3A and B. [file elife-52009-fig3-data1.xlsx]

## Sheet: Sheet1
	ctrl/normalized sliding	pav kd/normalized sliding	WT OE/normalized sliding	pav kd plus WT/normalized sliding
	2.72667	3.77558	0.791537	3.67846
	1.55151	3.27298	0.34478	1.99341
	1.31113	1.5078	0.354492	1.67534
	0.789109	0.864377	0.271939	1.16545
	0.296219	0.39334	0.179674	0.305931
	0.050989		0.177246	0.269511
	0.274367
	2.8136		1.23059	3.26698
	1.44871		0.804839	3.2184
	1.29441		0.616249	1.32679
	1.09915		0.541956	1.12392
	0.784837		0.389561	0.886751
	0.723878		0.541956	0.697209
	0.476236		0.389561	0.319078
	0.499095		0.345747	0.200972
	0.468616		0.288599	0.160968
	0.391466		0.123821
			0.097152
			0.040004
	1.54633	3.19691	2.48456	4.30888
	1.44788	1.96911	2.0444	3.70077
	0.949807	3.50386	1.86486	3.41699
	0.799228		0.579151	1.24517
	0.764479		0.590734	1.25676
	0.492278
	1.61153	3.20486	0.46434	0.93475
	0.388467	1.01366	0.421851
			0.291351
			0.279211
			0.267071
			0.242792
	1.77526	5.26082	1.38557	3.12474
	1.45051	3.18247	1.07526	2.98763
	1.19794	2.03505	1.16186	2.8866
	1.14742	1.73196	0.887629	2.43196
	0.82268	0.461856	0.512371	1.91237
	0.476289	0.339175	0.707216	2.21546
	0.129897	0.238144	0.216495	0.512371
		0.541237	1.33333
			0.940972
	2.77083	4.27431	0.923611	3.86458
	0.868056	1.76389	0.697917	2.53819
	0.833333	1.57639	0.347222	1.98958
		0.329861	0.100694	0.979167
	0.378472	0.510417	0.315972	0.958333
	0.149306	0.565972	0.159722	0.572917
		0.267361	0.541667	0.847222
			0.982639
			0.270833
			0.270833
			1.38542
