# Supplementary material for: Ser/Thr kinase Trc controls neurite outgrowth in Drosophila by modulating microtubule-microtubule sliding
Source: eLife. 2020 Feb 5;9:e52009. doi: 10.7554/eLife.52009 (PMC7021487; doi:10.7554/eLife.52009)
Supplement: Figure 3—source data 2. — Related to Figure 3C and D. [file elife-52009-fig3-data2.xlsx]

## Sheet: Sheet1
	ctrl/normalized sliding	pav kd/normalized sliding	pav kd plus WT/ normalized sliding	pav kd plus S745A/ normalized sliding
	2.40784	3.70135	6.35558	4.28931
	0.45357	3.12459	6.40037	8.66822
	0.246384	5.75642	7.02193	3.22539
	1.76388	5.44844	5.74522	6.73635
	2.85581	5.36444	5.16845	6.42837
	1.25992	3.67896	2.35184	6.19319
	0.89594	3.32058	1.93187	5.74522
	0.526365	2.18945	1.97107	5.27485
	0.582361	2.37984	2.25105	4.64769
	0.615959	1.88707	1.13112	3.16379
	0.251983	1.84788	0.935138	1.76388
	0.139991	1.68549		1.59029
	1.79873	5.64223	1.78176	1.68631
	0.827245	3.24534	1.32571	4.47561
	1.6757	3.19232	2.35447	3.64836
	1.13481	2.53476	1.83479	0.562102
	1.08178	2.44992	1.66509	2.92717
	0.965119	2.12114	1.00754	2.49234
	1.01815	1.74994	0.890879	1.83479
	0.413622	1.64388	0.593919	0.774216
	0.084846	1.1136	0.201508	0.943908
		0.965119		0.933302
	1.51803	14.9241*	1.29032	16.8406
	1.537	5.45541	4.49715	12.5617
	0.97723	5.9962	2.14421	9.27894
	1.06262	2.95066	0.645161	6.26186
	1.21442	2.6186	2.86528	1.98292
	1.11006	2.02087	1.40417	3.70019
	0.967742	0.588235	1.20493	1.926
	0.882353	3.41556	2.09677	2.95066
	0.483871	1.926	3.02657	4.0038
	0.246679	5.37002	0.635674
	3.40788		1.94529	2.85278
	0.830249		1.01368	1.9115
	0.275141		0.125503	2.0708
	0.946098		0.284795	1.10056
	0.410298		0.352373	1.36122
	0.13033		0.265487	1.67015
			0.091714	0.144811
			0.077233	0.362027
	2.32413	6.77649	6.2333	6.34907
	1.24666	5.12021	2.6358	4.61264
	1.45147	2.04808	0.64114	1.23776
	1.21104	2.72484	0.979519	2.65361
	1.09528	1.21995	1.46037	1.48709
	1.25557	4.62155	0.231523	0.552093
	0.160285	3.80232	1.09528	0.213713
	0.756901	2.18166	0.035619	0.044524
	0.329475			1.16652
	0.16919
