# Supplementary material for: Ser/Thr kinase Trc controls neurite outgrowth in Drosophila by modulating microtubule-microtubule sliding
Source: eLife. 2020 Feb 5;9:e52009. doi: 10.7554/eLife.52009 (PMC7021487; doi:10.7554/eLife.52009)
Supplement: Figure 3—source data 3. — Related to Figure 3E and F. [file elife-52009-fig3-data3.xlsx]

## Sheet: Sheet1
	Ctrl/% microtubule area	Trc RNAi/% microtubule area
	11.1801	41.0959
	20.2454	1.33929
	21.7687	14.0673
	21.875	27.0349
	30.6306	11.5502
	40	14.2857
	25.7426	25.5682
	34.3434	17.4419
	16.2791	18.5771
	29.6578	14.7059
	35.2601	4.98615
	23.5632	3.5
	7.38636	5.74324
	15.2893	16.3636
		16.5957
		3.80952
		11.7371
	7.86517	20.7921
	18.2222	10.241
	20.4546	8.69565
	42.8571	0.934579
		7.42188
		8.33333
		1.35135
		3.42857
		22.5989
