# Supplementary material for: Ser/Thr kinase Trc controls neurite outgrowth in Drosophila by modulating microtubule-microtubule sliding
Source: eLife. 2020 Feb 5;9:e52009. doi: 10.7554/eLife.52009 (PMC7021487; doi:10.7554/eLife.52009)
Supplement: Figure 3—source data 4. — Related to Figure 3G and H. [file elife-52009-fig3-data4.xlsx]

## Sheet: Sheet1
	WT /% microtubule area	S745A/% microtubule area
	39.8374	0.472144
	25.697	1.57618
	52.349	23.7668
	9.9723	4.64602
	16.2602
	54.4118	1.57593
	29.2835	3.52304
		0.396825
	4.64037	9.375
	40	2.91262
		9.22242
	5.21921	14.8352
	34.4765	4.72973
	40.8257	18.0921
		2.96167
		19.4245
		9.96835
		4.96894
