# Supplementary material for: Ser/Thr kinase Trc controls neurite outgrowth in Drosophila by modulating microtubule-microtubule sliding
Source: eLife. 2020 Feb 5;9:e52009. doi: 10.7554/eLife.52009 (PMC7021487; doi:10.7554/eLife.52009)
Supplement: Figure 4—source data 1. — Related to Figure 4B and C. [file elife-52009-fig4-data1.xlsx]

## Sheet: Sheet1
	ctrl/ normalized sliding	pav oe/ normalized sliding	1433 rnai/ normalized sliding	1433 rnai pav oe/ normalized sliding
	1.79867	1.34828	2.49896	1.42383
	1.70859	1.09838	1.67082	1.23205
	1.14778	0.738066	1.3105
	0.854296	0.017435	0.703196
	0.645081	0.156912	1.09838
	0.636364	0.13076	0.871731
	0.209215	0.049398	0.932752
		0.029058	0.697385
		0.122042	0.6044
		0.156912	0.3022
			0.325446
	2.94855	1.43311	2.87746	2.89242
	1.31338	0.32928	2.79139	1.82975
	1.1899	0.662301	1.07764	1.08887
	1.11506	0.407858	0.946679	1.10009
	0.587465	0.231993	0.793265	0.568756
	0.602432	0.389149	0.916745	1.24977
	0.748363	0.157156	0.351731	0.916745
	0.939196	0.160898	0.53508	0.84565
	0.684752	0.153414	0.396632	0.710945
	0.523854	0.029935	0.419083	0.254443
	0.362956	0.018709		0.613658
	0.984097			0.699719
	2.4341	0.902168		4.56649
	1.10135	0.111306		2.4048
	0.536028	0.070299		1.60516
	0.269479	0.038079		0.808436
	0.659051	0.058582		1.09549
				0.884593
				0.521383
				0.843585
				0.386643
				0.234329
