# Supplementary material for: Ser/Thr kinase Trc controls neurite outgrowth in Drosophila by modulating microtubule-microtubule sliding
Source: eLife. 2020 Feb 5;9:e52009. doi: 10.7554/eLife.52009 (PMC7021487; doi:10.7554/eLife.52009)
Supplement: Figure 4—source data 2. — Related to Figure 4D and E. [file elife-52009-fig4-data2.xlsx]

## Sheet: Sheet1
	Ctrl/ % microtubule area	1433RNAi/ %microtubule area
	3.11111	45
	17.6471	2.08333
	11.8644	3.32103
	24.4509	3.09278
	2.06612	1.85185
	46.7213	0
		0.947867
		7.10059
		5.85366
		2.30548
		11.3924
		2.45098
	10.1449	1.07527
	21.1009	14.2857
	24.1935
	32.6087
	4.09639
	16.1765	8.28729
	18.1395	0.847458
	9.45122	0.607903
	20.8421	0.550964
	2.72727	0.977995
	26.3441	1.84049
	2.36407	2.7439
	11.9891	5.32276
	15.3846
	20.2847
	10.6299
	2.29885
	6.03318
	22.6131
	16.9643
