# Supplementary material for: Ser/Thr kinase Trc controls neurite outgrowth in Drosophila by modulating microtubule-microtubule sliding
Source: eLife. 2020 Feb 5;9:e52009. doi: 10.7554/eLife.52009 (PMC7021487; doi:10.7554/eLife.52009)
Supplement: Figure 5—figure supplement 1—source data 1. — Related to B. [file elife-52009-fig5-figsupp1-data1.xlsx]

## Sheet: Sheet1
	Ctrl/ no branch points	Pav RNAi/ no branch points	trc RNAi/ no branch points	Trc Pav RNAi/ no branch points
	332	282	239
	267	330	225
	342	249	233
	468	209	226
	306	281	285
	212	193	443
	241	305	246
	228	287	284
	275	276	290
	163	346	249
		238
		245
		246
	200	338		538
	176	244		559
	264	281		216
	214	145		378
	254	222		360
	227	211
	146	150
	156	137
	85
	185
	141
			322	283
			566	307
			272	455
			367	491
			497	158
			448	616
			345
			343
			450
			335
	270			252
	163			222
	273			242
	138
	213
	129
	203
	150
	257
	260
	131
	221
