# Supplementary material for: Ser/Thr kinase Trc controls neurite outgrowth in Drosophila by modulating microtubule-microtubule sliding
Source: eLife. 2020 Feb 5;9:e52009. doi: 10.7554/eLife.52009 (PMC7021487; doi:10.7554/eLife.52009)
Supplement: Figure 5—source data 2. — Related to Figure 5C and D. [file elife-52009-fig5-data2.xlsx]

## Sheet: Sheet1
	ctrl/ um	PavRNAi/ um	TrcRNAi/ um	Double RNAi/ um
	3080	2988	3066
	3495	3870	3441
	3744	5028	3563
	3449	3554	4368
	3105	3567	4375
	3101	2940	4236
	3037	4349	4049
	2324	3396	3794
	2806	3259	5245
		3299
		4950
		3440
	2952	4133	3513	2637
	1911	3813	2770	3630
	2874	3443	3213	4028
	2849	3582	2974	2965
		3637	2724	3167
		4536	3170	2751
		4474	3379
			3174
			3333
	2156			5442
	2185			4097
	2142			3930
	3318			4578
	2726			4687
	2266
	2663
	1482
	2551
	2259
	2014
	1631			2021
	1873			3180
	2004			2532
	2650			2179
	1918
	1917
